# Supplementary material for: Targeting pathological cells with senolytic drugs reduces seizures in neurodevelopmental mTOR-related epilepsy
Source: PubMed Central journal article supplement (PMC11156583; doi:10.1038/s41593-024-01634-2), 2024-05-06
Supplement: 41593_2024_1634_MOESM1_ESM.pdf [file 41593_2024_1634_MOESM1_ESM.pdf]

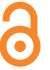

---

# Targeting pathological cells with senolytic drugs reduces seizures in neurodevelopmental mTOR-related epilepsy

---

In the format provided by the authors and unedited

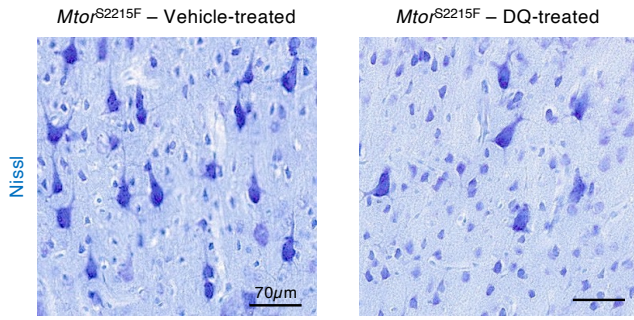

**Supplementary Fig. 1. Histological Nissl coloration of cortical slices from DQ-treated and Vehicle-treated *Mtor*<sup>S2215F</sup> mice. Coloration was repeated three times on n=3 animals.**

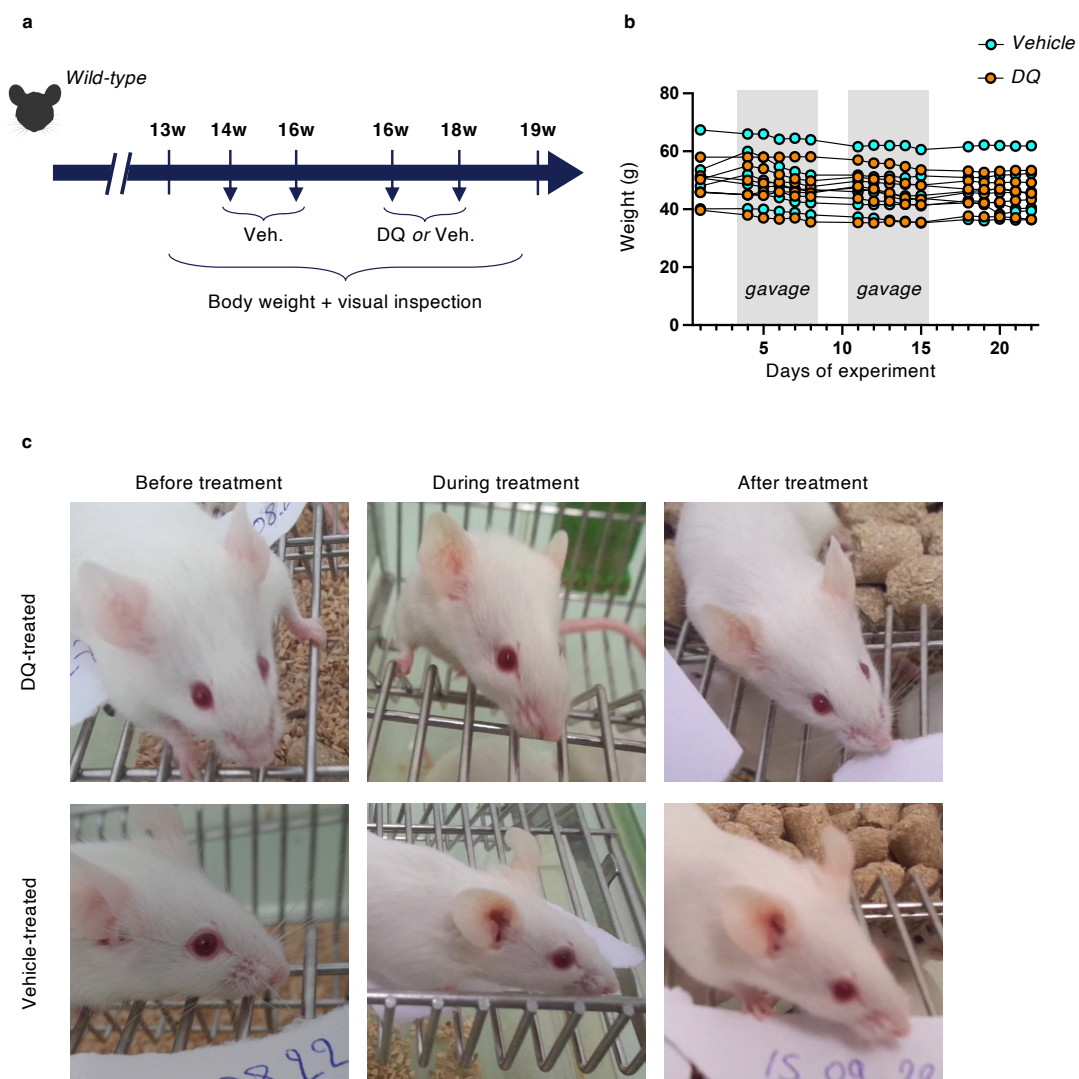

**Supplementary Fig. 2. Absence of major side-effects in DQ-treated wild-type animals.** (a) Study design for evaluation of potential deleterious effects following DQ administration. (b) Evolution of mouse body weight following DQ or vehicle administration by gavage over the course of two weeks on n=6 animals receiving either DQ or vehicle. (c) Representative images of facial indicators to assess animal well-being according to the mouse grimace scale.

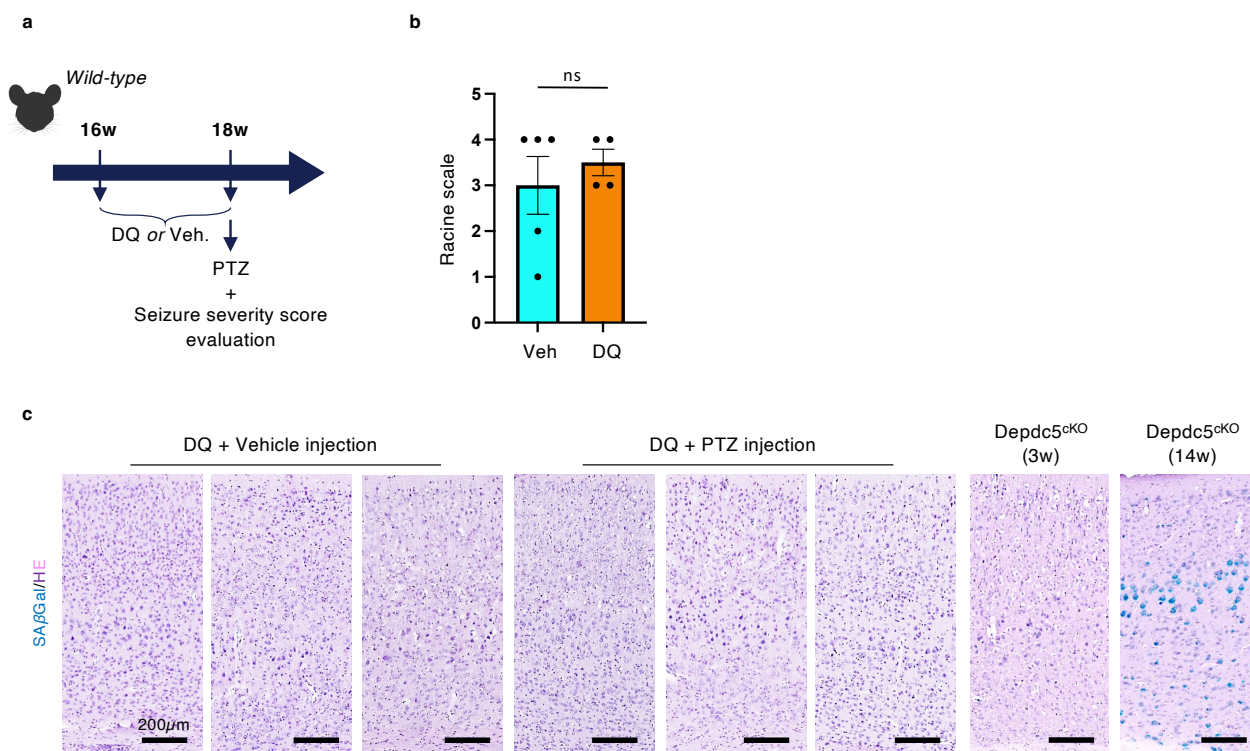

**Supplementary Fig. 3. Absence of antiepileptic effects of DQ administration in a mouse model of pentylenetetrazol-induced seizures.** (a) Study design for evaluation of potential antiepileptic effects following DQ administration. (b) Maximum seizure severity score reached based on Racine scale in  $n=5$  animals who received vehicle and  $n=4$  animals who received DQ (1: sudden behavioral arrest, 2: head nodding, 3: forelimb clonus with rearing, 4: generalized tonic-clonic seizure, 5: lethal seizure). Two-tailed Mann-Whitney test. ns:  $P=0.8413$  (c) SAβGal colorimetric assay in pentylenetetrazol (PTZ)-induced seizures following vehicle or DQ administration. SAβGal colorimetric assay on a negative control (3 weeks-old Depdc5<sup>ckO</sup>) and a positive control (14 weeks-old Depdc5<sup>ckO</sup>). Scatter dot plots are presented as mean  $\pm$  SEM. Colorimetric assay was repeated at least two times.

**Supplementary Table 1. Detailed clinical features of the patient cohort**

| Patient ID                | Neuropathology | Sex | Seizure frequency | Duration of epilepsy | Engel score | Anti-seizure medication | Used for experiments         |
|---------------------------|----------------|-----|-------------------|----------------------|-------------|-------------------------|------------------------------|
| <b>Cases</b>              |                |     |                   |                      |             |                         |                              |
| 1 (FCD-64)                | FCDIIB         | M   | Daily             | 2.5y                 | 1           | VPA, CBZ                | IHC, SA $\beta$ Gal          |
| 2 (FCD-33)                | FCDIIa         | M   | Weekly            | 5.6y                 | 1           | CBZ                     | IHC, SA $\beta$ Gal          |
| 3 (FCD-56)                | FCDIIB         | F   | Daily+            | 15.4y                | 1           | ZNS, TPM, OXC, LTG      | IHC, SA $\beta$ Gal, LCM, EM |
| 4 (FCD-57)                | FCDIIB         | M   | Daily+            | 8.7y                 | 3           | LTG, OXC                | EM                           |
| 5 (FCD-59)                | FCDIIB         | M   | Daily+            | 11.7y                | 2           | CLB, OXC                | IHC, SA $\beta$ Gal          |
| 6 (FCD-61)                | FCDIIB         | M   | Weekly            | 6.5y                 | 2           | CBZ, STP, VGB           | IHC, SA $\beta$ Gal          |
| 7 (FCD-70)                | FCDIIB         | M   | Daily             | 13.6y                | 2           | CLB, CBZ, TPM, FBM      | EM                           |
| 8                         | FCDIIB         | M   | Daily             | N/A                  | 1           | LEV, VPA, CBZ, CLB      | IHC, MEA                     |
| 9                         | FCDIIB         | M   | Daily             | 28y                  | 1           | CBZ, LCS, CLB           | MEA                          |
| 10 (FCD-36)               | HME/IIa        | F   | Daily+            | 2.4m                 | 3           | CBZ, LEV, VGB           | IHC, SA $\beta$ Gal          |
| 11 (HME-73)               | HME/IIa        | F   | Daily+            | 2.4m                 | 1           | CBZ, ZNS, LKZ, LEV      | EM                           |
| 12 (HME-74)               | HME/IIa        | M   | Daily+            | 1.3y                 | 1           | LCS, VPA                | SA $\beta$ Gal, EM           |
| 13 (HME-77)               | HME/IIa        | M   | Daily             | 6m                   | 1           | TPM, VGB, CLB           | IHC, SA $\beta$ Gal, LCM     |
| 14 (HME-79)               | HME/IIb        | M   | Daily+            | 4.8m                 | 1           | VPA, TPM, CBZ, CLB      | IHC, SA $\beta$ Gal          |
| 21                        | FCDIIa         | M   | Daily             | 7y                   | 1           | CBZ, LEV                | IHC, SA $\beta$ Gal          |
| 22                        | FCDIIB         | F   | Daily             | 4y                   | 2           | LCS, OXC                | IHC, SA $\beta$ Gal          |
| 23                        | FCDIIB         | M   | Weekly            | 6.6y                 | 1           | LCS, OXC, ZNS           | IHC, SA $\beta$ Gal          |
| 24                        | FCDIIB         | F   | Daily             | 3.7y                 | 1           | CBZ, LCS                | IHC, SA $\beta$ Gal          |
| 25                        | FCDIIB         | M   | Daily             | 6.3y                 | 1           | CBZ                     | IHC, SA $\beta$ Gal          |
| 26                        | FCDIIB         | M   | Daily             | 4y                   | 3           | TPM, RIS                | IHC, SA $\beta$ Gal          |
| 27 (FCD-65)               | FCDIIB         | M   | Daily             | 2.8y                 | 1           | LTG, VPA                | IHC, SA $\beta$ Gal          |
| 28                        | FCDIIB         | F   | Daily             | 5y                   | 1           | LEV, VGB                | IHC, SA $\beta$ Gal          |
| 29                        | FCDIIa         | F   | Daily             | 3.4y                 | 1           | OXC, TPM, VGB           | IHC, SA $\beta$ Gal          |
| 30                        | FCDIIB         | F   | Daily             | 11y                  | 1           | CBZ, TPM                | IHC, SA $\beta$ Gal          |
| <b>Epileptic controls</b> |                |     |                   |                      |             |                         |                              |
| 15 (FCD-16)               | FCDI           | F   | Daily+            | 2y                   | 2           | OXC, LEV                | IHC, SA $\beta$ Gal          |
| 16 (FCD-13)               | mMCD           | M   | Weekly            | 8.8y                 | 3           | VPA                     | IHC, SA $\beta$ Gal          |

|             |      |   |        |      |   |               |                     |
|-------------|------|---|--------|------|---|---------------|---------------------|
| 17 (FCD-18) | FCDI | F | Daily  | 3.4y | 1 | OXC, LTG, CLB | IHC, SA $\beta$ Gal |
| 18 (FCD-7)  | mMCD | F | Daily+ | 5.3y | 2 | CLB, CBZ      | IHC, SA $\beta$ Gal |
| 19 (FCD-12) | FCDI | M | Weekly | 3.5y | 3 | LCS, OXC      | IHC, SA $\beta$ Gal |
| 20 (FCD-6)  | mMCD | F | Daily+ | 1.7y | 3 | VPA, LEV, VGB | IHC, SA $\beta$ Gal |
| 31 (FCD-17) | FCDI | F | Daily  | 2m   | 1 | CZP, VPA      | IHC, SA $\beta$ Gal |
| 32 (FCD-5)  | mMCD | F | Daily  | 3y   | 1 | CLB, LCS, OXC | IHC, SA $\beta$ Gal |
| 33 (FCD-8)  | mMCD | F | Daily  | 9.7y | 2 | CBZ           | IHC, SA $\beta$ Gal |
| 34 (FCD-15) | mMCD | M | Daily  | 6.3y | 1 | OXC, VPA      | IHC, SA $\beta$ Gal |
| 35          | mMCD | F | Daily  | 3.1y | 3 | LEV, VGB      | IHC, A $\beta$ Gal  |
| 36          | mMCD | M | Daily  | 6y   | 1 | CBZ, STP      | IHC, SA $\beta$ Gal |
| 37 (FCD-10) | FCDI | M | Daily  | 5.1y | 1 | LCS, OXC      | IHC, SA $\beta$ Gal |

Abbreviations: HME: hemimegalencephaly; mMCD: mild malformation of cortical development with excessive heterotopic neurons; m: months; y: years; duration of epilepsy: duration between seizure onset and surgery; Daily+: multiple per day. Seizure frequency is based on long-term EEG recordings. Anti-seizure medication abbreviations: CBZ: carbamazepine; CLB: clobazam; CZP: clonazepam; FBM: felbamate; LEV: levetiracetam; LCS: lacosamide; LKZ: licozam; LTG: lamotrigine; OXC: oxcarbazepine; RIS: risperidone; STP: stiripentol; VGB: vigabatrin; VPA: valproic acid; TPM: topiramate; ZNS: zonisamide. IDs in parentheses refer to patients previously reported in Baldassari et al <sup>11</sup>. Column 'Used for exp' indicates for which type of experiment samples were used; ICC: immunohistochemistry, SA $\beta$ Gal: SA $\beta$ Gal colorimetric assay; EM: electron microscopy; LCM: laser-capture microdissection followed by ddPCR; MEA: multielectrode array.

**Supplementary Table 2. Descriptive statistics of the patient cohort**

|                 | <b>Age at surgery</b> | <b>Age at seizure onset</b> | <b>Duration of epilepsy</b> | <b>Seizure frequency</b> |
|-----------------|-----------------------|-----------------------------|-----------------------------|--------------------------|
| <b>Cases</b>    | 8.45y (9.22y)         | 1.99y (3.22y)               | 6.45y (6.35y)               | 2.17 (0.64)              |
| <b>Controls</b> | 7.67y (4.78y)         | 3.22y (4.11y)               | 4.47y (2.75y)               | 2.08 (0.64)              |
| <b>P value</b>  | P=0.7364              | P=0.3586                    | P=0.2042                    | P=0.6871                 |

Descriptive statistics of four clinical parameters in the patient (n = 37) cohort. Data are presented as mean and SD between parentheses. For seizure frequency, a score of 1 was attributed for 'Weekly', a score of 2 for 'Daily' and a score of 3 for 'Daily+'. No statistical difference was observed between cases and controls by two-tailed unpaired t-test with Welch's correction.

**Supplementary Table 3. List of differentially produced cytokines in *Depdc5*<sup>ckO</sup> mice**

| Analytes | Canonical SASP | mTOR dependent | Diff. produced cKO vs. WT |                    |
|----------|----------------|----------------|---------------------------|--------------------|
|          |                |                | 5 weeks                   | 10 weeks           |
| IL1b     | X              | X              | P=0.3939 ns               | <b>P=0.0022 **</b> |
| IL6      | X              | X              | P=0.2576 ns               | <b>P=0.0303 *</b>  |
| CXCL1    | X              | X              | P=0.5887 ns               | <b>P=0.0022 **</b> |
| CXCL2    | X              | X              | P=0.1320 ns               | <b>P=0.0043 **</b> |
| CXCL10   | X              | X              | <b>P=0.0260 *</b>         | <b>P=0.0022 **</b> |
| CCL2     | X              | X              | P=0.6991 ns               | <b>P=0.0022 **</b> |
| CCL20    | X              | X              |                           | <b>P=0.0195 *</b>  |
| CCL3     | X              |                | P=0.3095 ns               | <b>P=0.0022 **</b> |
| IL16     |                |                | P>0.9999 ns               | <b>P=0.0260 *</b>  |
| IL17A    |                |                | P=0.4848 ns               | P=0.4156 ns        |
| IL17C    |                |                | P=0.2403 ns               | <b>P=0.0368 *</b>  |
| IL21     |                |                | P=0.0568 ns               | <b>P=0.0173 *</b>  |
| IL22     |                |                | P=0.3723 ns               | <b>P=0.0152 *</b>  |
| IL33     |                |                |                           |                    |
| TNFa     |                |                |                           | <b>P=0.0238 *</b>  |

The following analytes (n =14/29) were not detected in electrochemiluminescent assay: IL15, IFNg, IL2, IL4, IL5, IL9, IL10, IL12, IL17E, IL17F, IL23, IL27, IL30, IL31. Statistics: two-tailed Mann-Whitney test.



**Supplementary Table 4. List of differentially produced cytokines in Mtor<sup>S2215F</sup> mice**

| Analytes | Canonical SASP | mTOR dependent | Diff. produced mTOR <sup>S225F</sup> vs. GFP |
|----------|----------------|----------------|----------------------------------------------|
| IL1b     | X              | X              | P=0.0022 **                                  |
| IL6      | X              | X              | P=0.0173 *                                   |
| CXCL1    | X              | X              | P=0.0022 **                                  |
| CXCL2    | X              | X              | P=0.0022 **                                  |
| CXCL10   | X              | X              | P= 0.0022 **                                 |
| CCL2     | X              | X              | P=0.0022 **                                  |
| CCL3     | X              |                | P=0.0260 *                                   |
| IL16     |                |                | P=0.0022 **                                  |
| IL17A    |                |                | P=0.9372 ns                                  |
| IL17C    |                |                | P=0.6688 ns                                  |
| IL33     |                |                | P=0.0649 ns                                  |
| TNFa     |                |                | P=0.0022 **                                  |

The following analytes (n = 17/29) were not detected in electrochemiluminescent assay: CCL20, IL15, IFNg, IL2, IL4, IL5, IL9, IL10, IL12, IL17E, IL17F, IL21, IL22, IL23, IL27, IL30, IL31. Statistics: two-tailed Mann-Whitney test.
